# Supplementary material for: A robust cell culture system supporting the complete life cycle of hepatitis B virus
Source: PubMed Central journal article supplement (PMC5709435; doi:10.1038/s41598-017-16882-5), 2017-11-30
Supplement: 41598_2017_16882_MOESM1_ESM.pdf [file 41598_2017_16882_MOESM1_ESM.pdf]

## Supplementary Material

### **A robust cell culture system supporting the complete life cycle of hepatitis B virus**

Eleftherios Michailidis<sup>1</sup>, Jonathan Pabon<sup>1,8</sup>, Kuanhui Xiang<sup>1,2,8</sup>, Paul Park<sup>1</sup>, Vyas Ramanan<sup>3</sup>, Hans-Heinrich Hoffmann<sup>1</sup>, William M. Schneider<sup>1</sup>, Sangeeta N. Bhatia<sup>4,5</sup>, Ype P. de Jong<sup>1,6</sup>, Amir Shlomai<sup>7</sup>, Charles M. Rice<sup>1,\*</sup>

<sup>1</sup>Laboratory of Virology and Infectious Disease, The Rockefeller University, New York, NY, USA.

<sup>2</sup>Department of Microbiology and Center of Infectious Disease, School of Basic Medical Sciences, Peking University Health Science Center, Beijing, China.

<sup>3</sup>Department of Health Sciences and Technology, Massachusetts Institute of Technology, Cambridge, MA.

<sup>4</sup>Institute for Medical Engineering and Science, David H. Koch Institute for Integrative Cancer Research, Department of Electrical Engineering and Computer Science, Massachusetts Institute of Technology, Cambridge, MA.

<sup>5</sup>Howard Hughes Medical Institute, Chevy Chase, MD.

<sup>6</sup>Division of Gastroenterology and Hepatology, Weill Cornell Medical College, New York, NY, USA.

<sup>7</sup>Department of Medicine D and the Liver Institute, Rabin Medical Center, Belinson Hospital, Petach-Tikva and Sackler Faculty of Medicine, Tel Aviv University, Tel Aviv, Israel.

<sup>8</sup>Equal contribution.

\* For correspondence: [ricec@rockefeller.edu](mailto:ricec@rockefeller.edu)

## Supplementary Figure S1

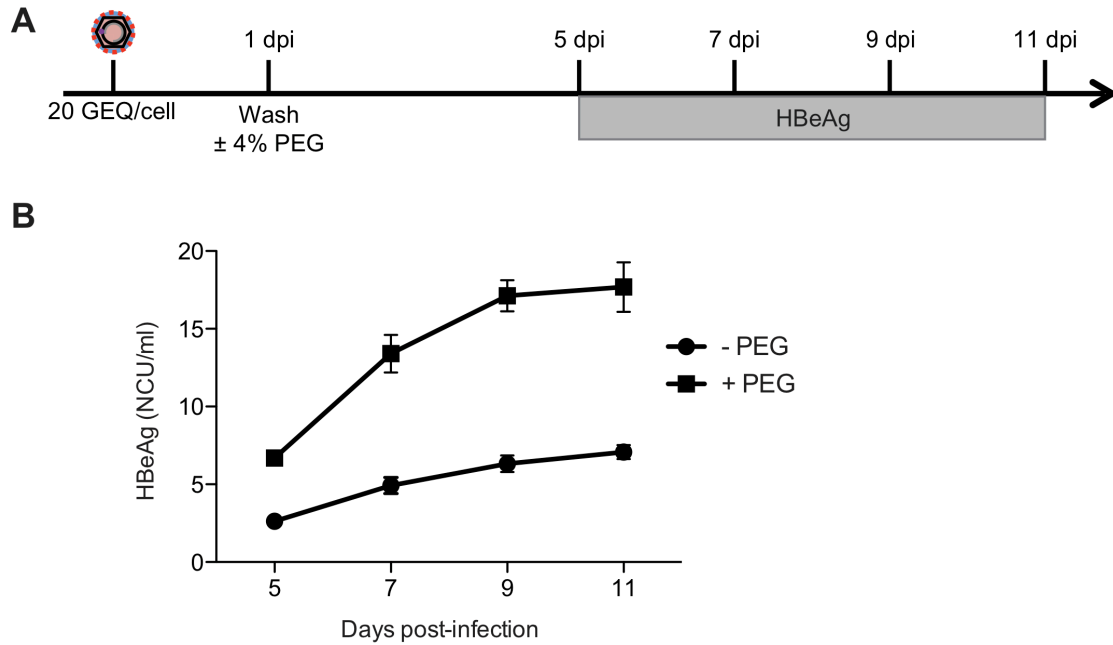

**Figure S1. Time course of enhanced HBV infection efficiency in the presence of continuous PEG treatment.** (A) Schematic of experimental design for panel B. (B) Cells were infected with 20 GEQ/cell in the presence of 4% PEG. Then, 1 dpi cells were washed and medium was added in the presence or absence of 4% PEG. After the indicated time points (5, 7, 9 or 11 dpi) supernatants were harvested and secreted HBeAg was measured. Four biological replicates were performed and data are shown as means  $\pm$  s.d.
